# Supplementary material
Source: MDPI journal article supplement (https://www.mdpi.com/2073-4395/9/12/786)

**Figure S1:** The flaming cart used in our laboratory experiments and demonstration of the pots arrangement on a straight line simulating a seed line in the field.

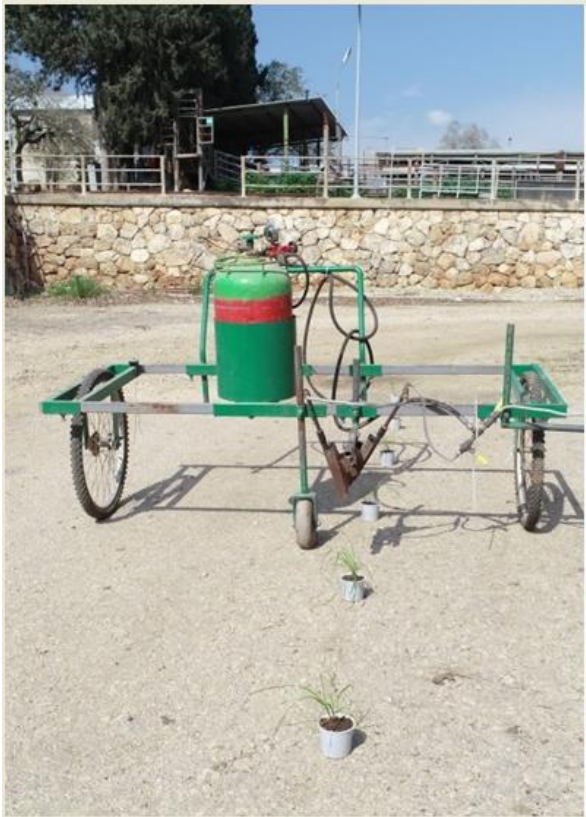

**Figure S2:** Illustration of two of the effective flaming width experimental treatments, 45° and 30 cm (A) and 30° and 30 cm (B) burner mounting angle and inter-burner distance, respectively. In both images the left hand containers was not treated and used as control.

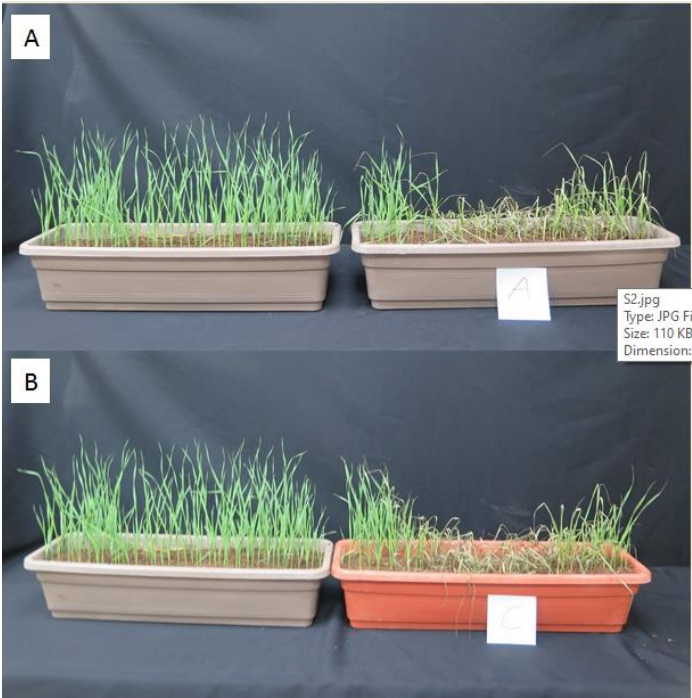

**Figure S3:** The flaming cart used in our field experiments (A) and a close up image on the burners setup (B).

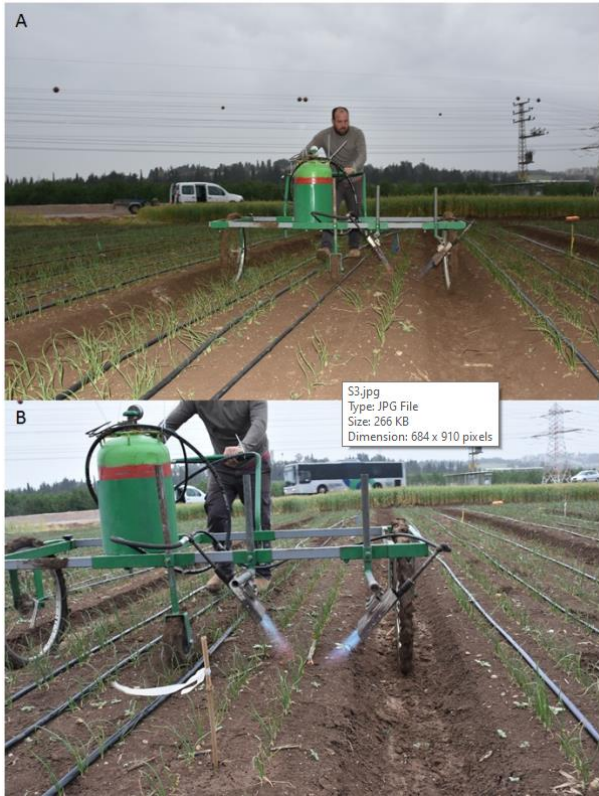

**Figure S4:** Orlando plants in the Kfar baruch field trial following the flaming treatments; two weeks after two leaf stage application (A) and one week after three leaf application (B).

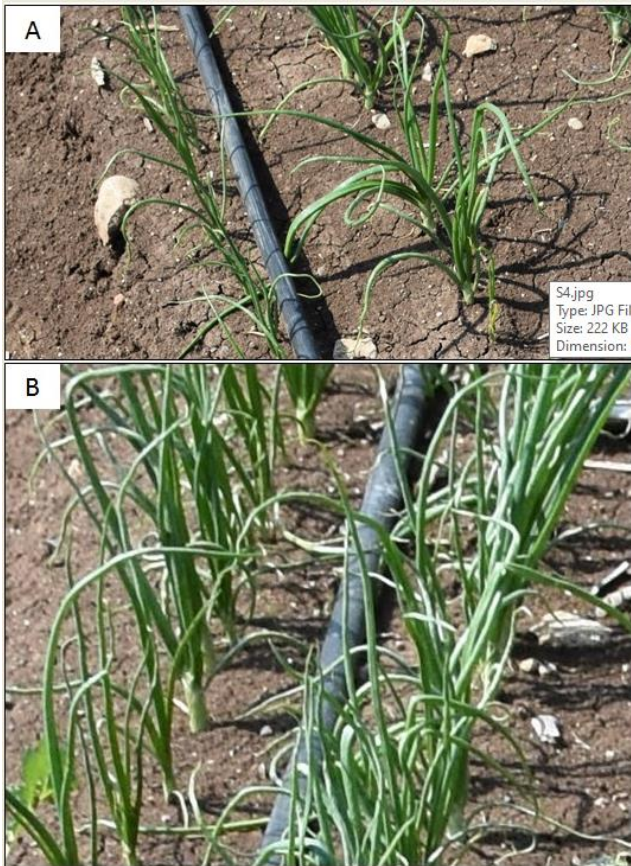

Supplement: s1 [file s1]
